# Supplementary material for: Atomically precise metal nanoclusters combine with MXene towards solar CO 2 conversion
Source: Royal Society of Chemistry journal article supplement (doi:10.1039/d4sc03663h), 2024-01-01
Supplement: d4sc03663h1.pdf [file d4sc03663h1.pdf]

## *Supporting Information*

### **Atomically Precise Metal Nanoclusters Combine with MXene Towards Solar CO<sub>2</sub> Conversion**

Yu-Shan Cai,<sup>a</sup> Jia-Qi Chen,<sup>a</sup> Peng Su,<sup>a</sup> Xian Yan,<sup>a</sup> Qing Chen,<sup>a</sup> Yue Wu,<sup>a</sup> Fang-Xing Xiao<sup>\*a, b</sup>

a. College of Materials Science and Engineering, Fuzhou University, New Campus, Minhou, Fujian

Province, 350108, China.

b. State Key Laboratory of Structural Chemistry, Fujian Institute of Research on the Structure of Matter,

Chinese Academy of Sciences, Fuzhou, Fujian 350002, PR China.

E-mail: [fxxiao@fzu.edu.cn](mailto:fxxiao@fzu.edu.cn)

# 1. Experimental section

## 1.1 Materials

Cadmium chloride ( $\text{CdCl}_2 \cdot 2.5\text{H}_2\text{O}$ ), Sulfur powder (S), hydrochloric acid (HCl), lithium fluoride (LiF), 2-mercaptoethylamine (MEA),  $\text{Au}_x$  clusters Gold (III) chloride trihydrate ( $\text{HAuCl}_4 \cdot 3\text{H}_2\text{O}$ ), ethanol ( $\text{C}_2\text{H}_6\text{O}$ , EtOH), acetonitrile ( $\text{C}_2\text{H}_3\text{N}$ ), triethanolamine ( $\text{C}_6\text{H}_{15}\text{NO}_3$ , TEOA), DL-Lactic acid ( $\text{C}_3\text{H}_6\text{O}_3$ ), Methanol ( $\text{CH}_4\text{O}$ ), Ethanol ( $\text{C}_2\text{H}_6\text{O}$ ), Ethylene glycol ( $\text{C}_2\text{H}_6\text{O}_2$ ) and sodium sulfate ( $\text{Na}_2\text{SO}_4$ ) were obtained from Sinopharm Chemical Reagent Co., Ltd. (Shanghai, China).  $\text{Ti}_3\text{AlC}_2$  power was obtained from Laizhou Kai Kai Ceramic Materials Co., Ltd. L-glutathione (GSH) was obtained from Sigma-Aldrich. Deionized water (DI  $\text{H}_2\text{O}$ , Millipore,  $18.2 \text{ M}\Omega \cdot \text{cm}$  resistivity).

## 1.2 Photoelectrochemical (PEC) measurements

PEC measurements were carried out on electrochemical workstations (CHI 660E and Gamary Interface 1000 E) in a conventional three-electrode quartz cell, which use Pt plate as the counter electrode, Ag/AgCl electrode as the reference electrode, and the samples coated on FTO were utilized as the working electrodes. The working electrodes were prepared on fluorine-doped tin oxide (FTO) glass that was cleaned by sonication in ethanol for 30 min and dried at 353 K. The boundary of FTO glass was protected using scotch tape. The 5 mg sample was completely dispersed in 0.5 mL of ethyl alcohol absolute by sonication to get slurry which uniformly was spread onto the pretreated FTO glass. After drying in the air, the working electrode was further dried at 353 K for 2 h to improve adhesion. Then the Scotch tape was unstuck, and the uncoated part of the electrode was isolated with nail polish. The exposed area of the working electrode was  $1 \text{ cm}^2$ . Besides,  $\text{Na}_2\text{SO}_4$  (0.5 M, pH=6.69) aqueous solution was used as the electrolyte. Average electron lifetime ( $\tau_n$ ) of the photoelectrode is determined by the following equation:

$$\tau = \frac{k_B T}{e(dV_{oc}/dt)^{-1}} \quad \text{Equation (1)}$$

where  $\tau$  is the potential-dependent electron lifetime,  $k_B$  is the Boltzmann's constant ( $1.38 \times 10^{-23} \text{ J/K}$ ),  $T$  is the temperature (298 K),  $e$  is the charge of a single electron ( $1.6 \times 10^{-19} \text{ C}$ ), and  $V_{oc}$  is the open-circuit voltage

at time  $t$ . Charge carrier density ( $N_D$ ) of photoelectrode is calculated by the formula below.

$$N_D = \left( \frac{2}{\varepsilon \varepsilon_0 e_0} \right) \left[ \frac{d(1/c^2)}{dV} \right]^{-1} \quad \text{Equation (2)}$$

where  $\varepsilon$  is the dielectric constant ( $\varepsilon_{CdIn_2S_4} = 6.60$ ),  $\varepsilon_0$  is the vacuum permittivity ( $8.86 \times 10^{-12}$  F/m),  $e_0$  is the electronic charge unit ( $1.6 \times 10^{-19}$  C), and  $V$  is the potential.

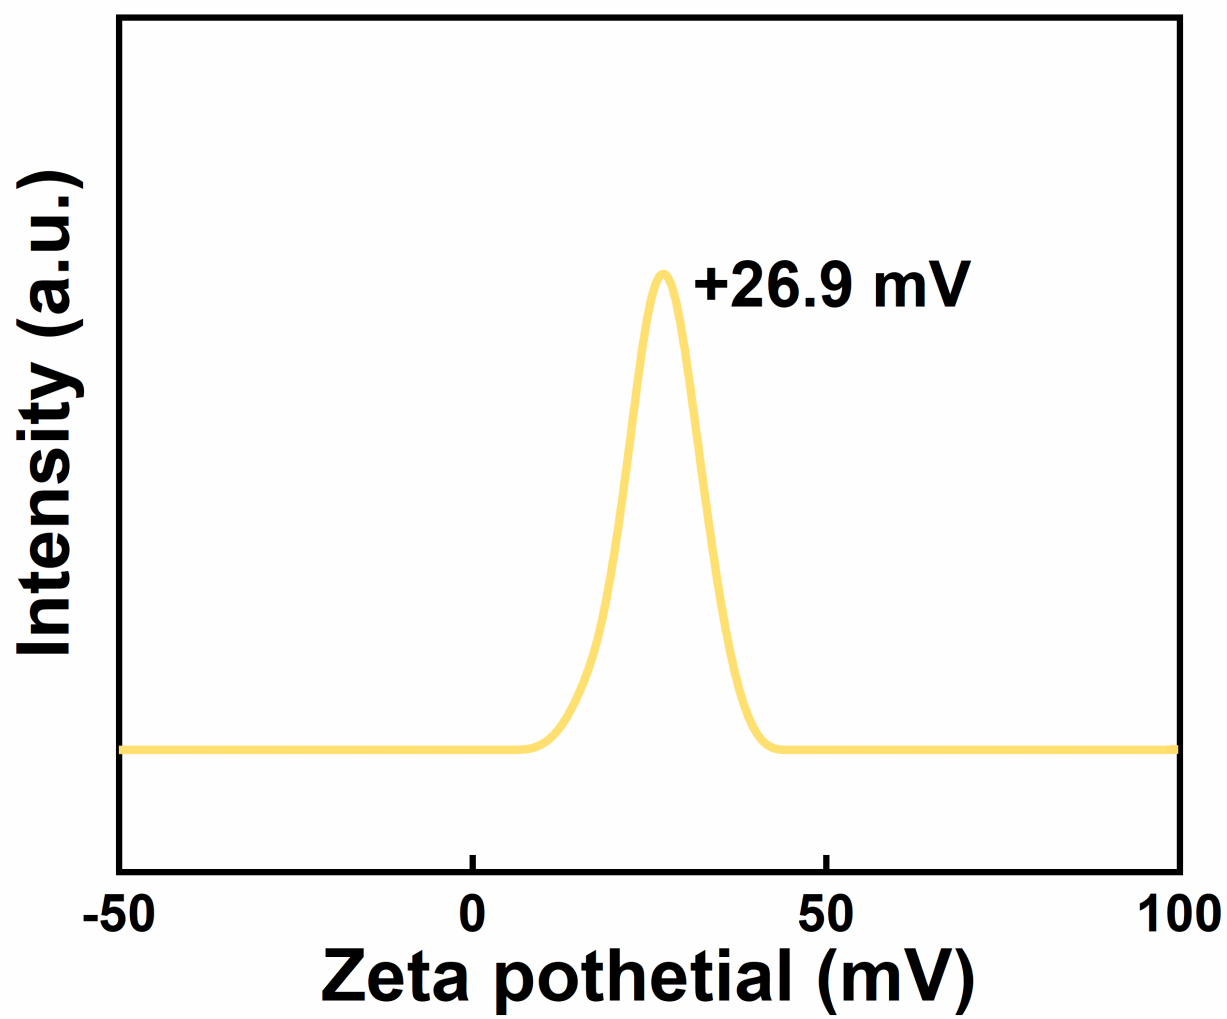

Fig. S1. Zeta potential of CdS aqueous solution.

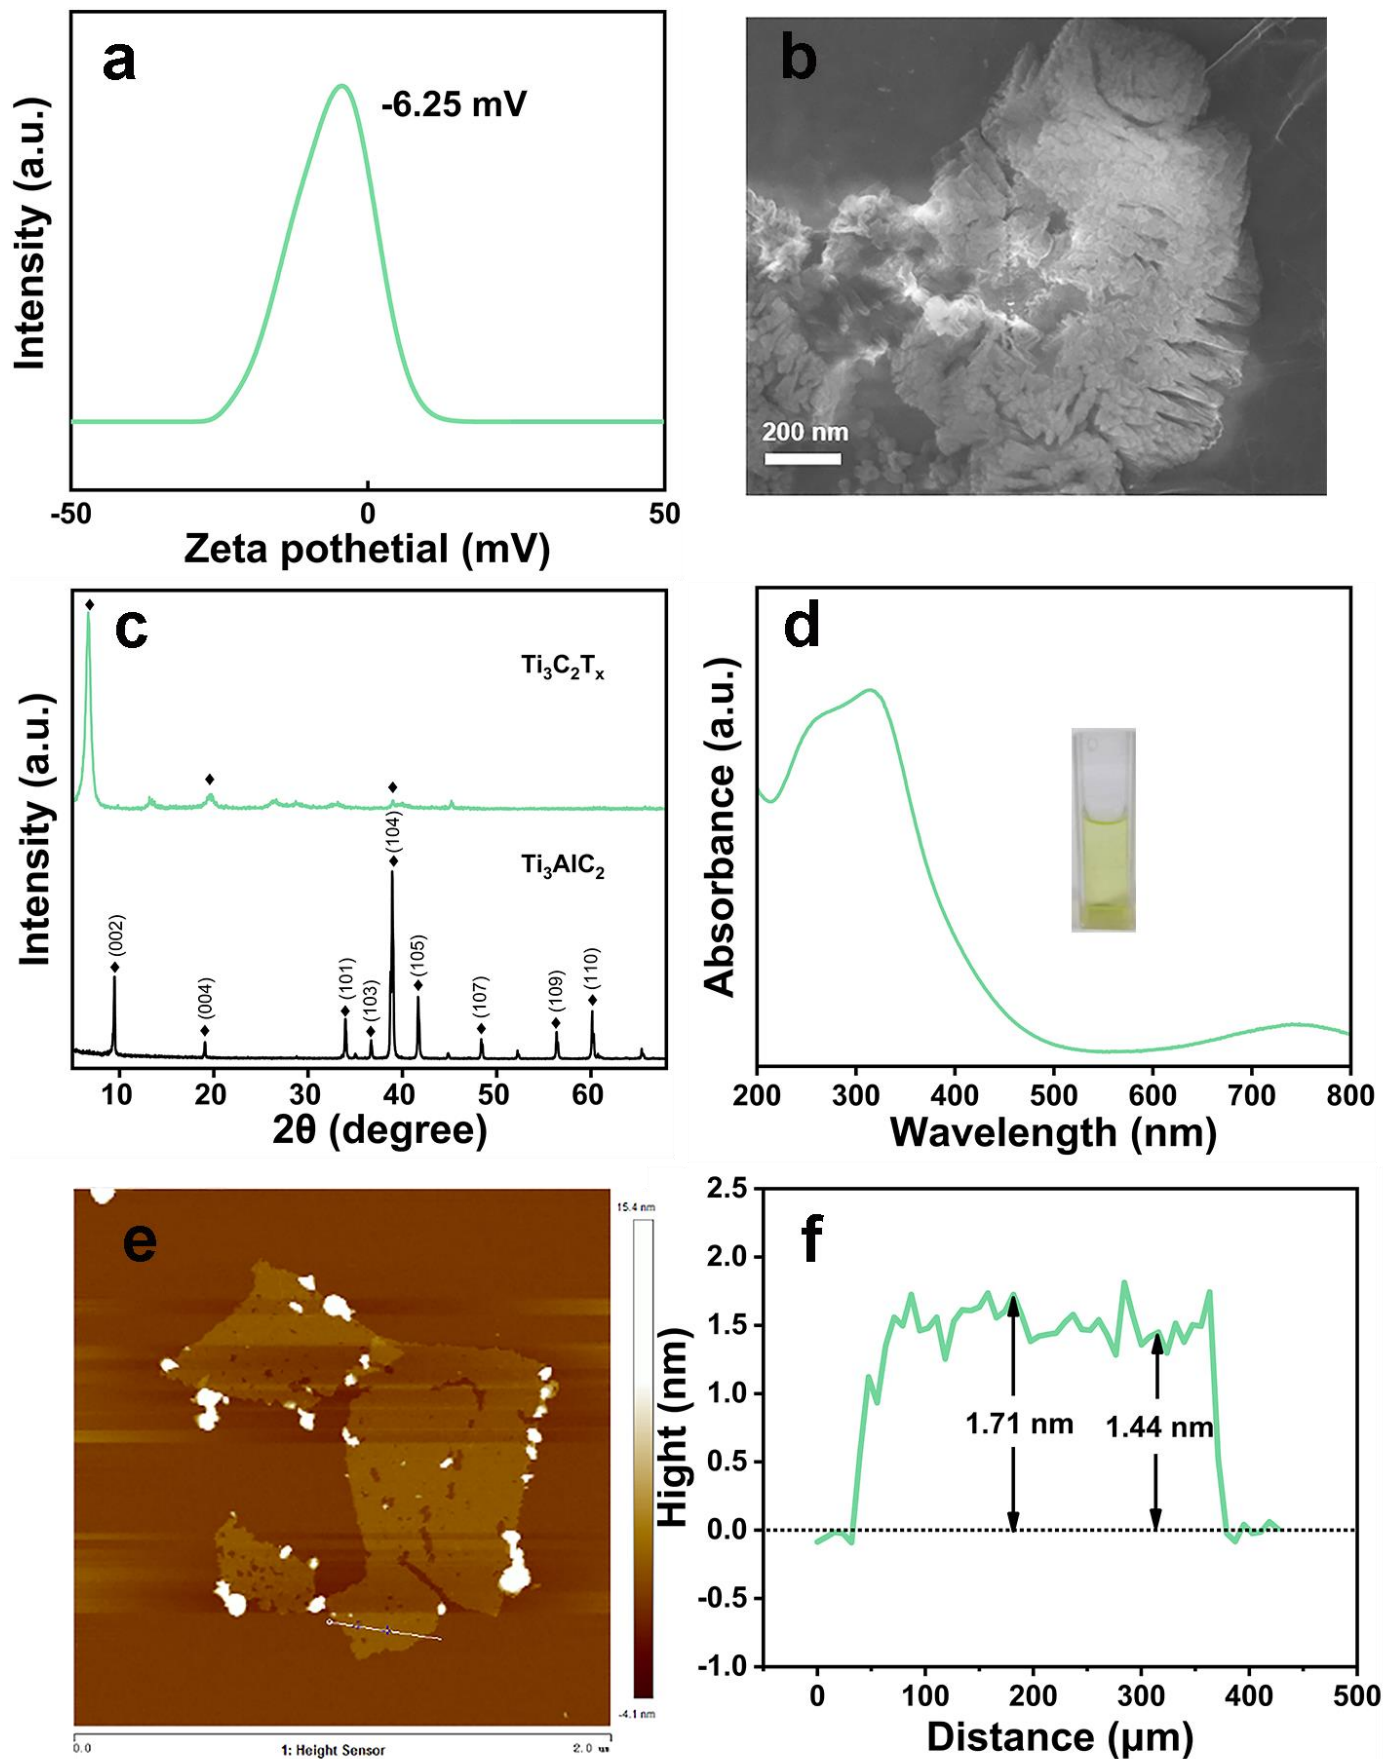

**Fig. S2.** (a) Zeta potential (pH=7), (b) FESEM image, (c) XRD pattern, (d) UV-vis absorption spectrum, (e) and AFM image & (f) height profile of  $Ti_3C_2T_x$  NSs.

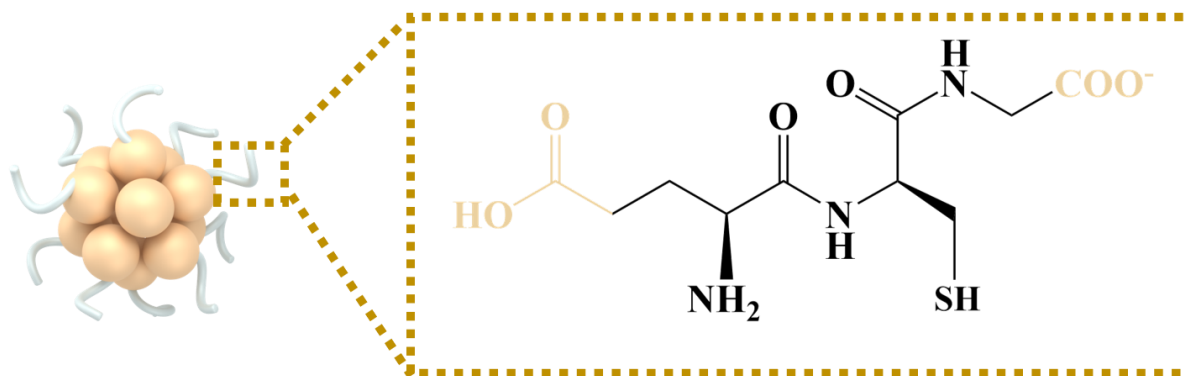

**Fig. S3.** Schematic model of Au<sub>x</sub> NCs along with the molecular structure of GSH ligand.

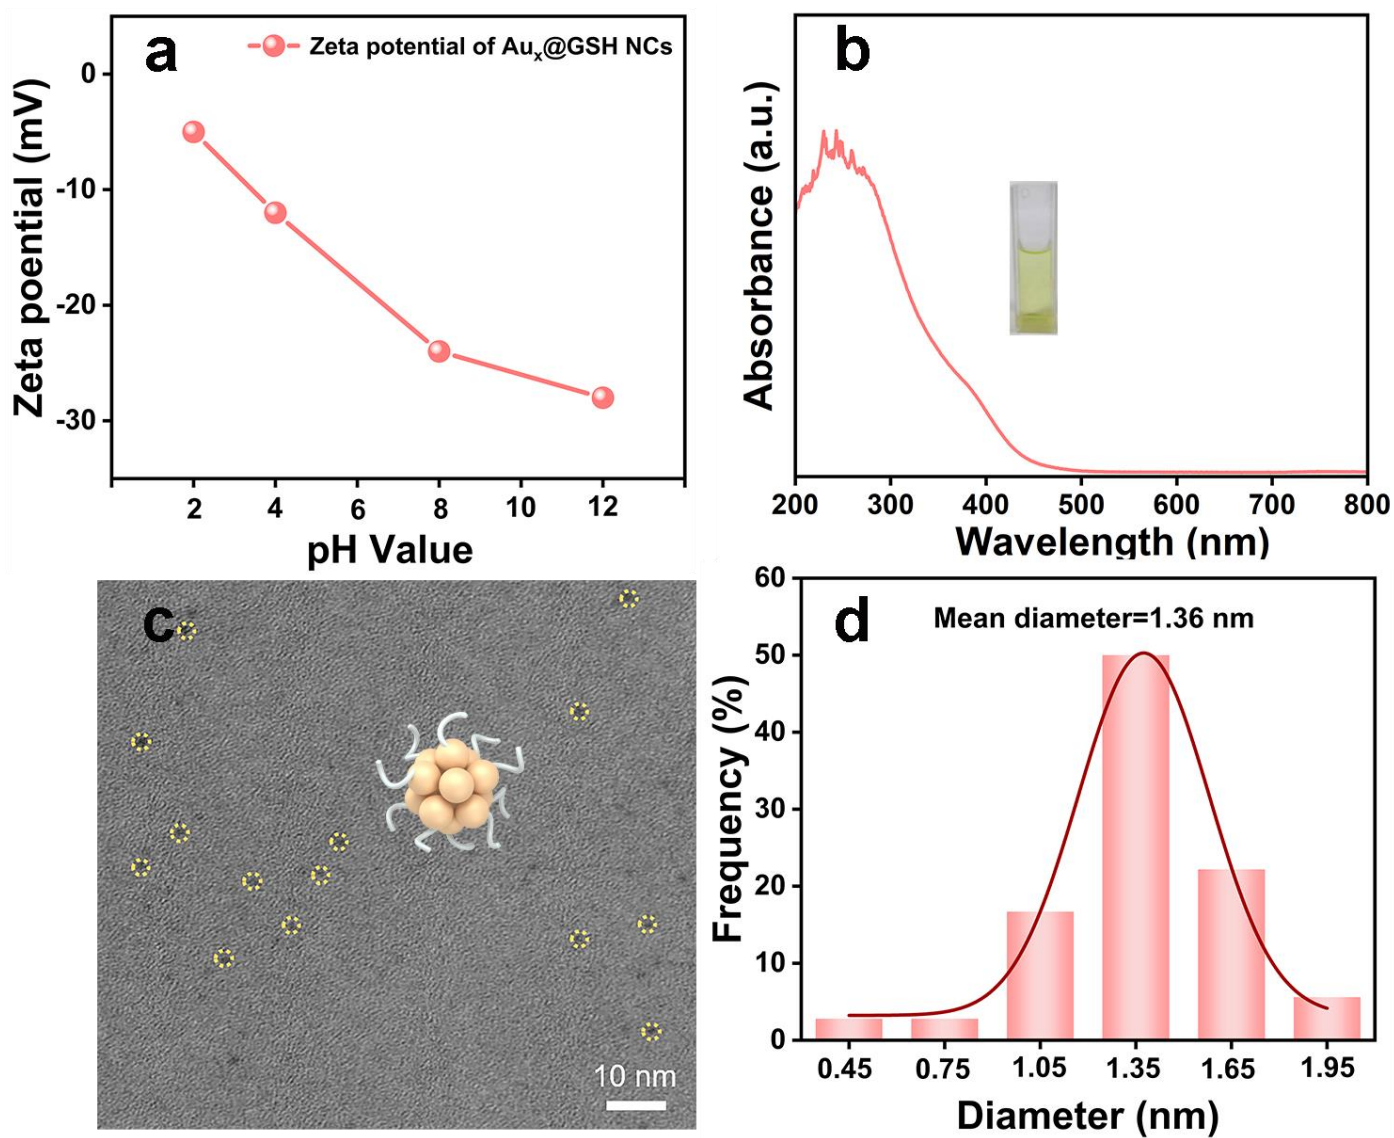

**Fig. S4.** (a) Zeta potentials and (b) UV-vis absorption spectrum, (c)TEM image and (d) size distribution histogram of Au<sub>x</sub>@GSH NCs.

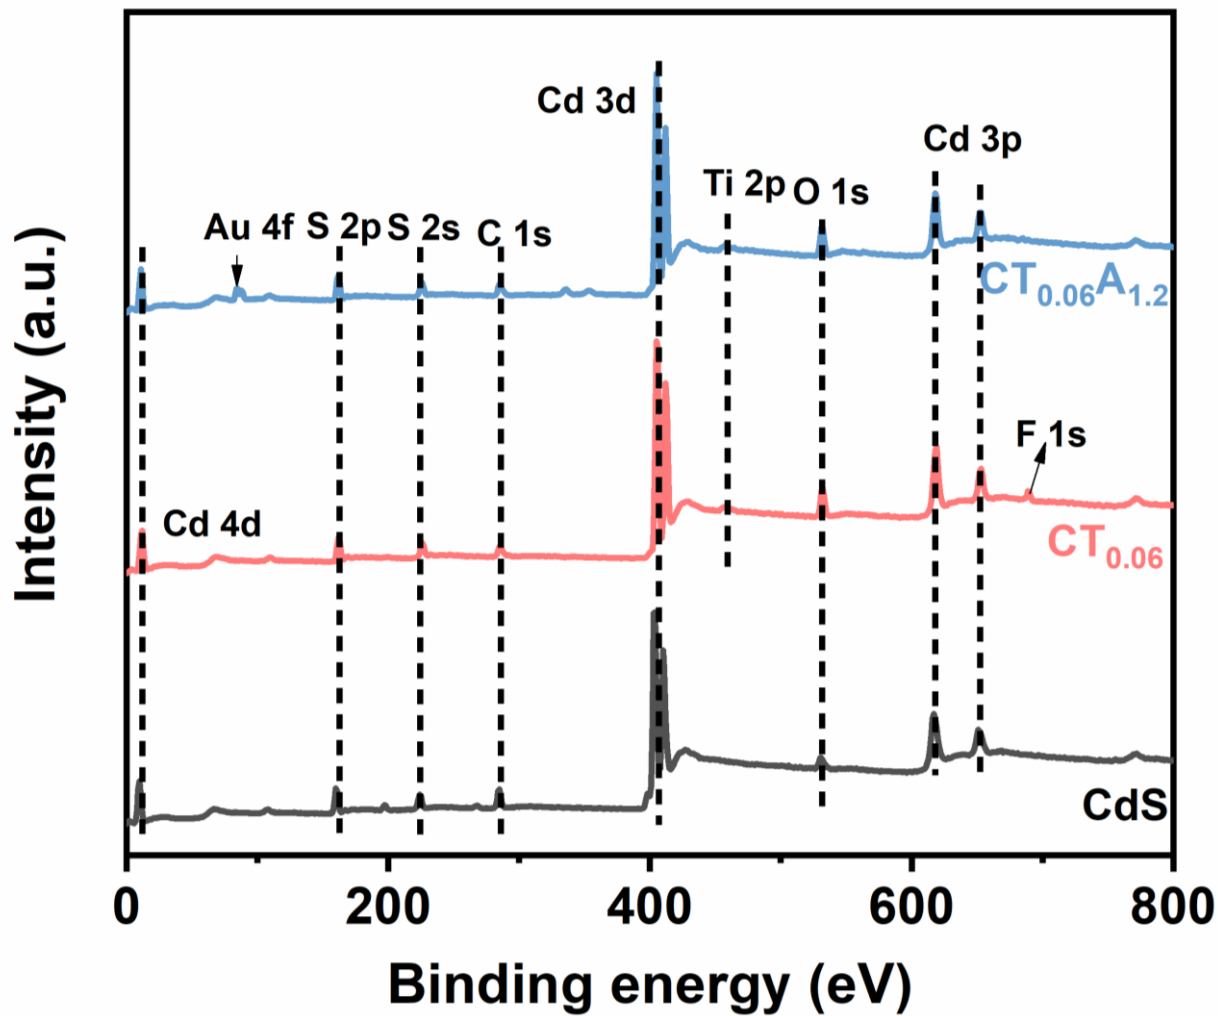

Fig. S5. Survey spectra of CdS, CT<sub>0.06</sub> and CT<sub>0.06</sub>A<sub>1.2</sub>.



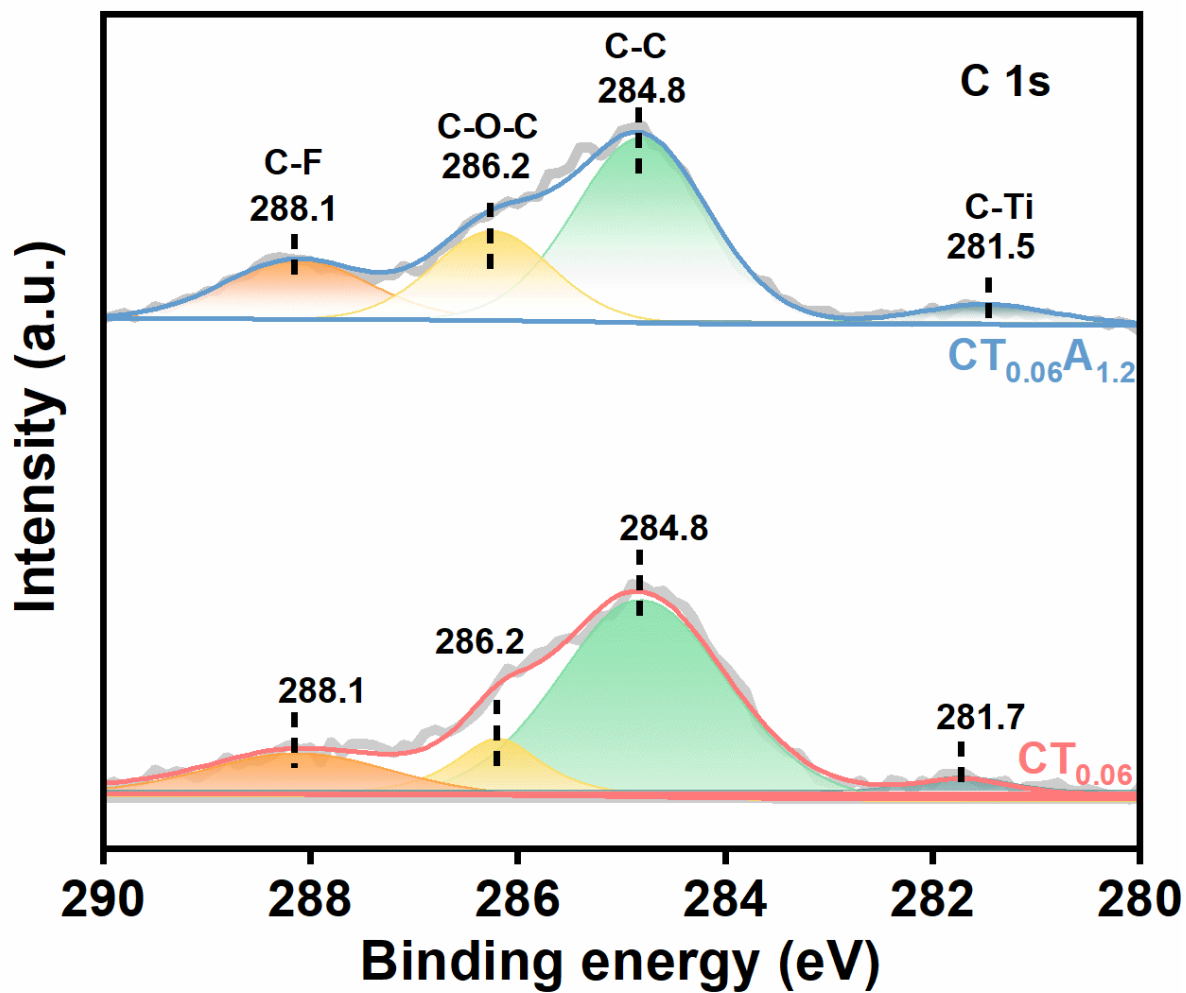

Fig. S6. High-resolution C 1s spectra of  $CT_{0.06}$  and  $CT_{0.06}A_{1.2}$ .

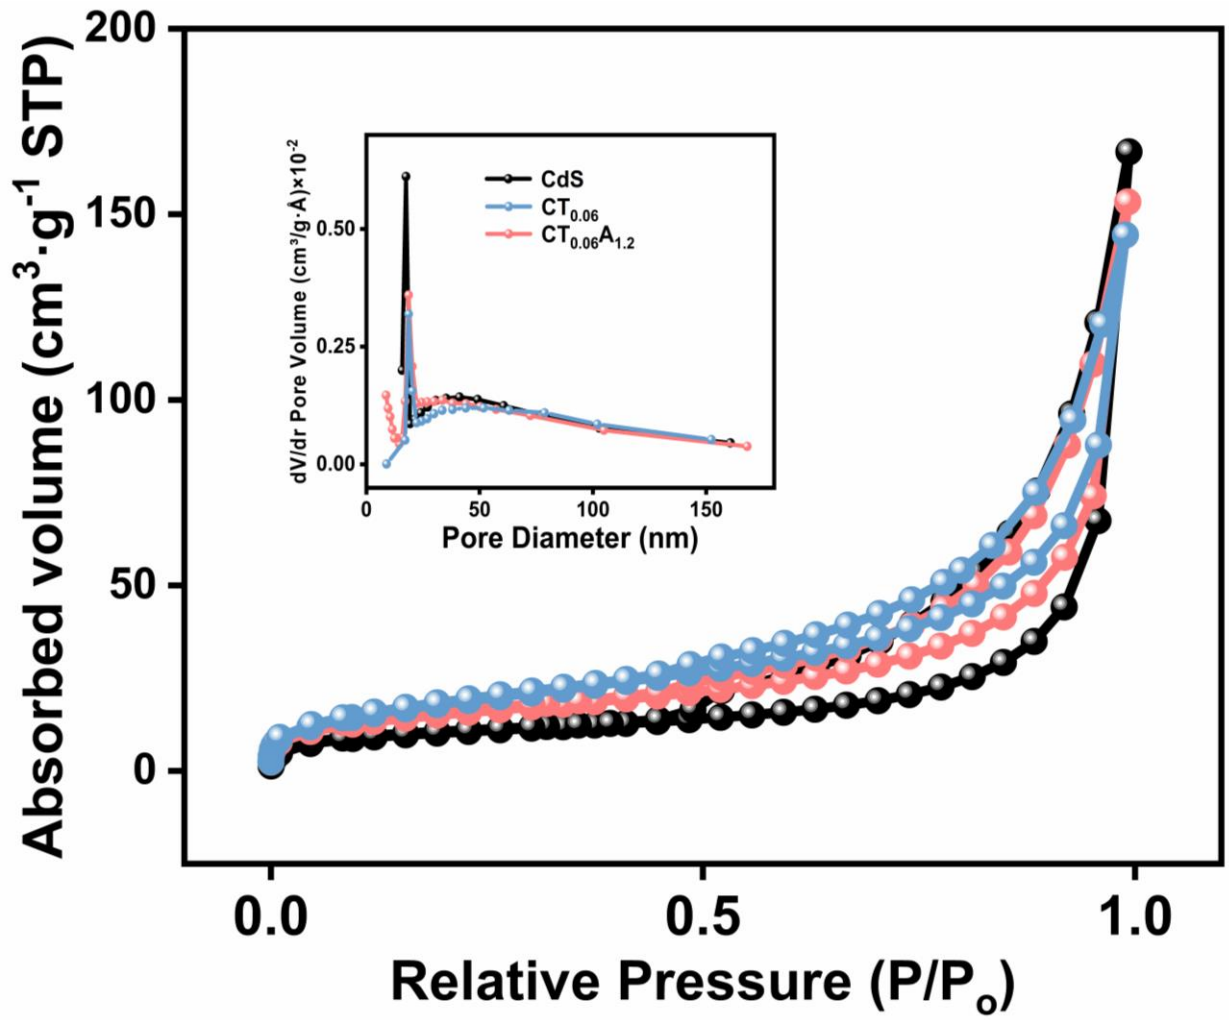

**Fig. S7.** Nitrogen adsorption/desorption isotherms and Pore-size distribution curves of CdS, CT<sub>0.06</sub> and CT<sub>0.06</sub>A<sub>1.2</sub>.

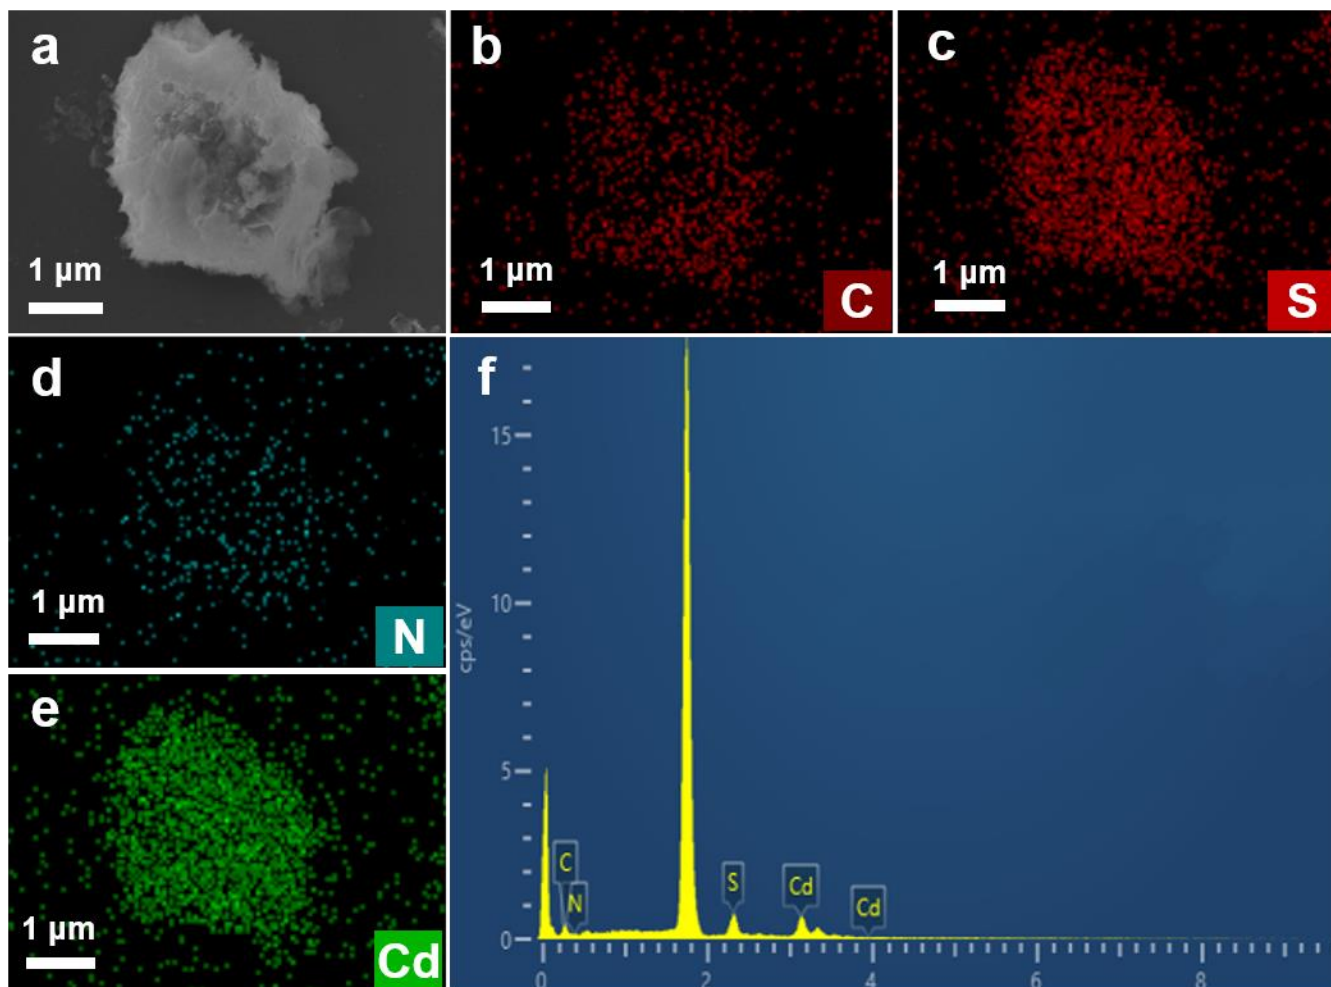

**Fig. S8.** (a) FESEM image and (b-e) elemental mapping & (f) EDS results of CdS NSs.

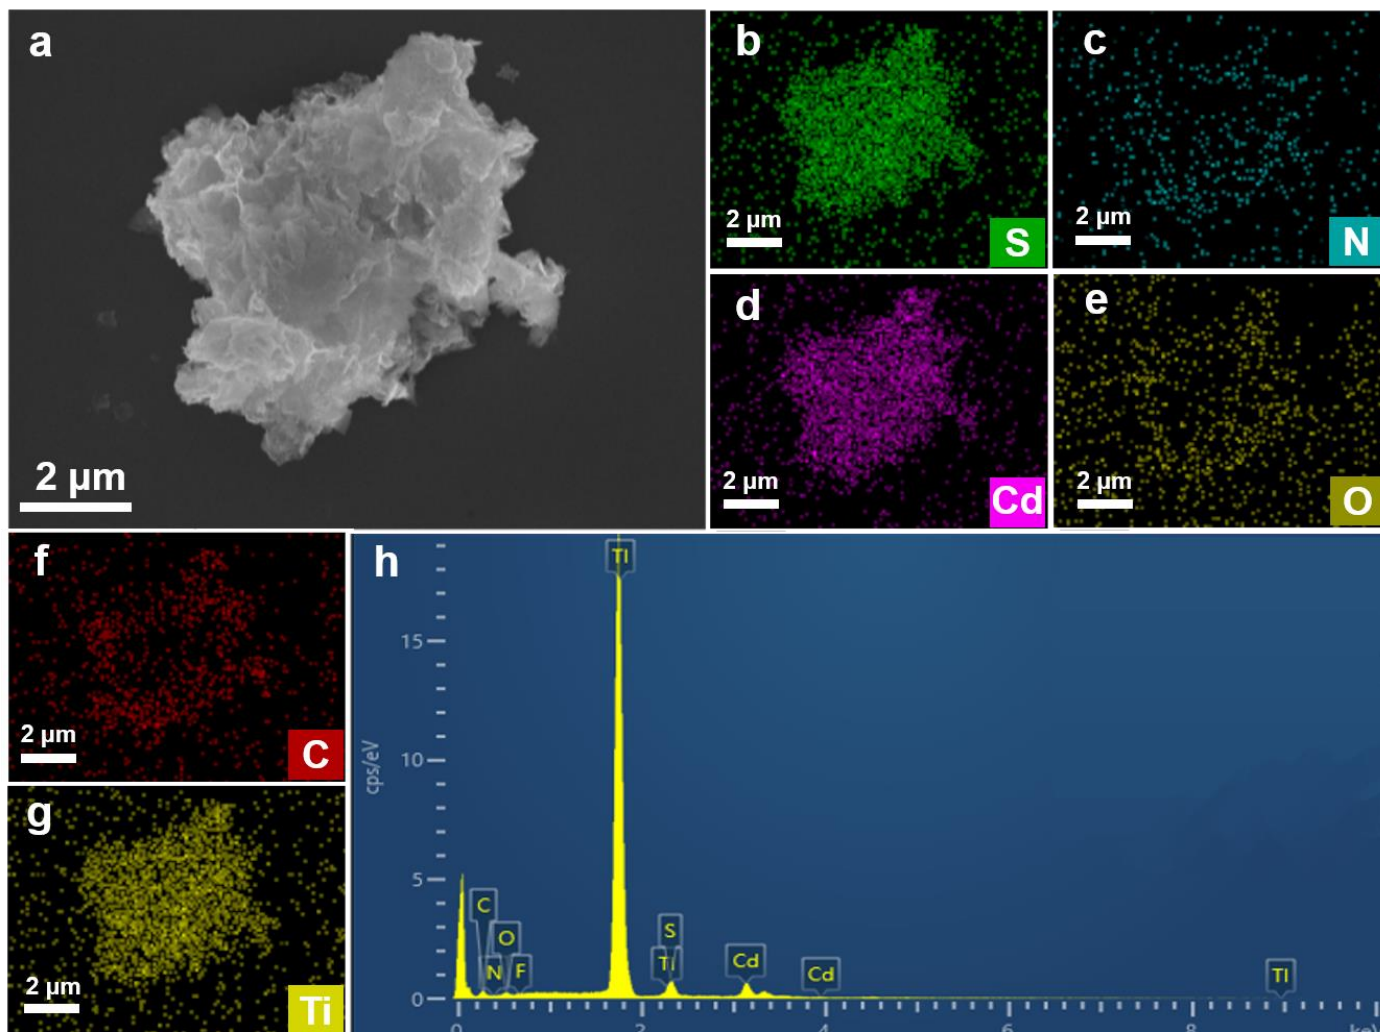

**Fig. S9.** (a) FESEM image and (b-g) elemental mapping & (h) EDS results of CT<sub>0.06</sub>.

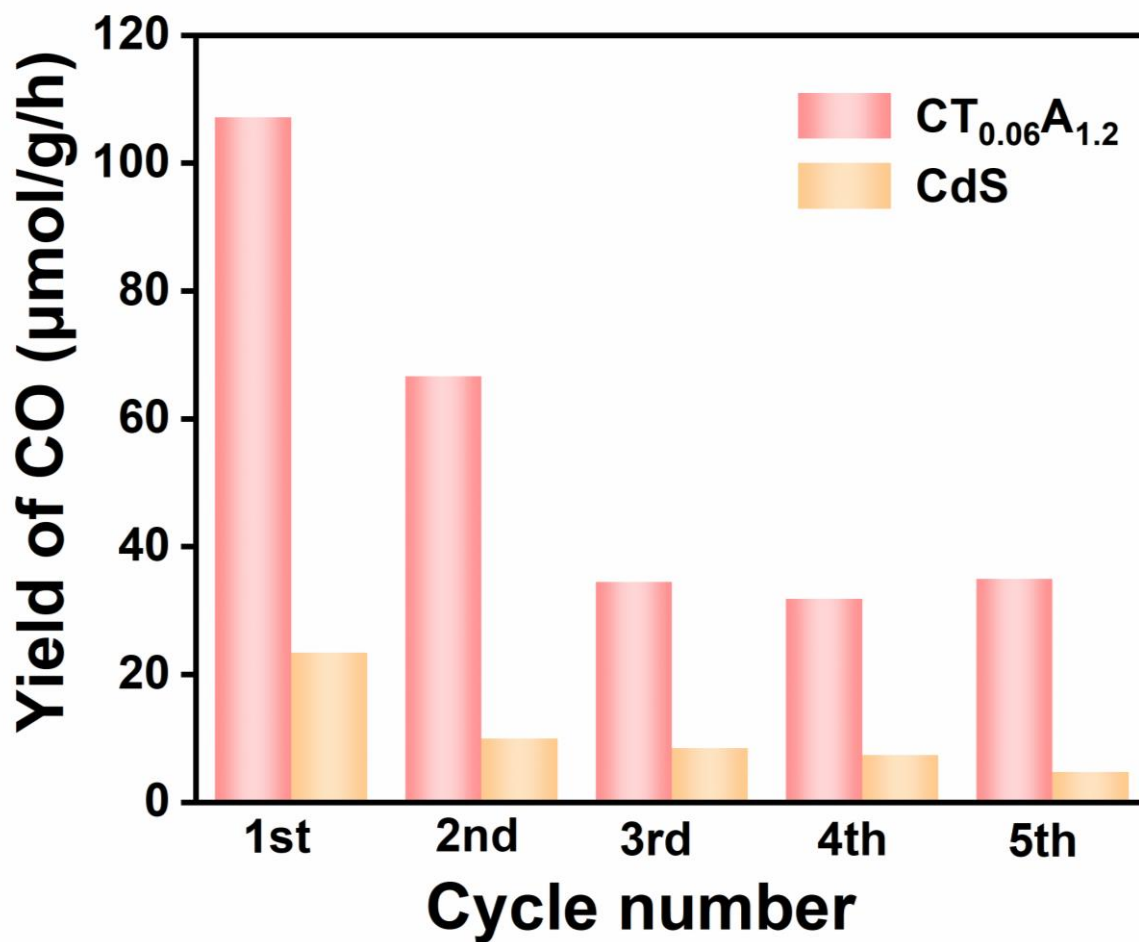

Fig. S10. Stability measurements for CdS and CT<sub>0.06</sub>A<sub>1.2</sub>.

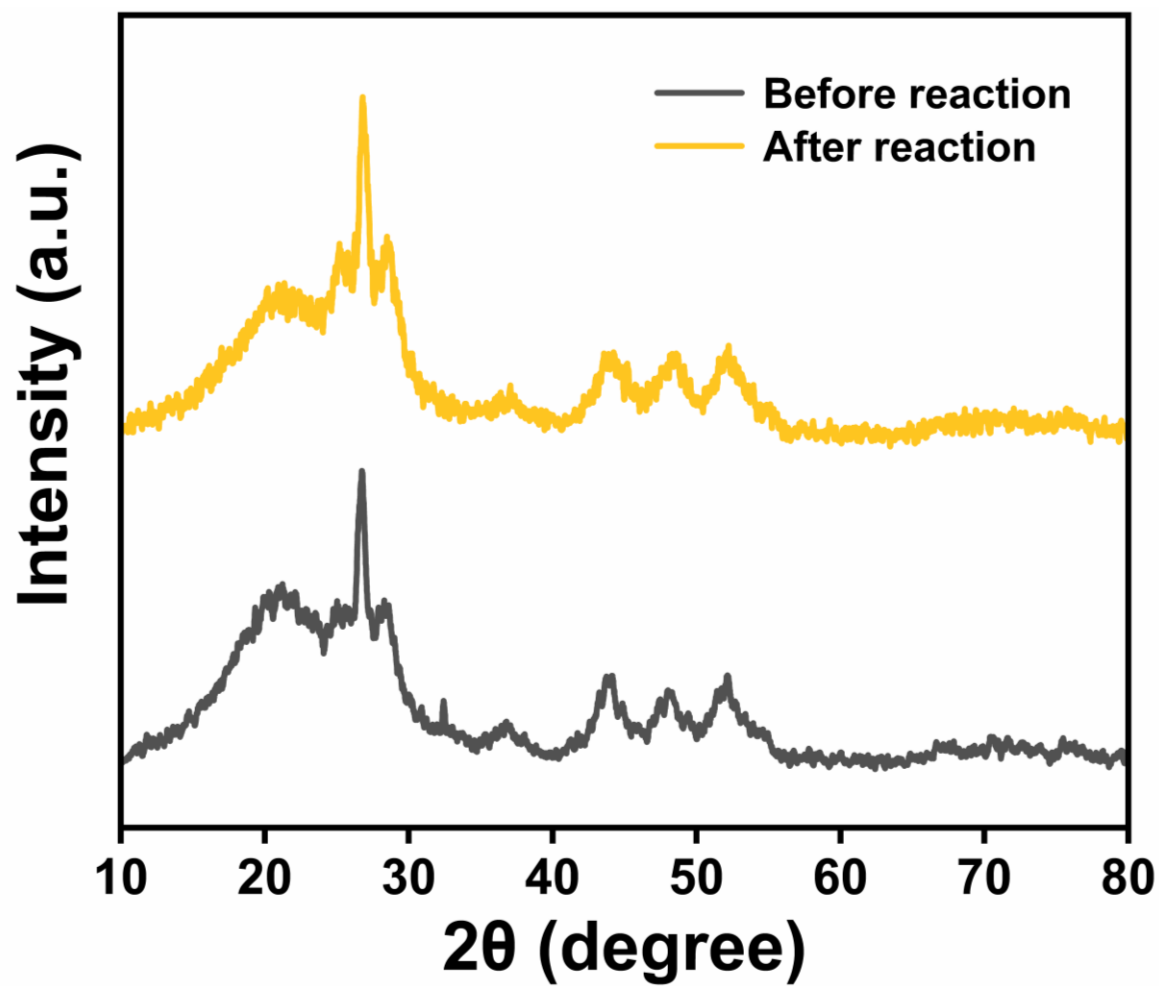

Fig. S11. XRD patterns of CTA before and after reaction.

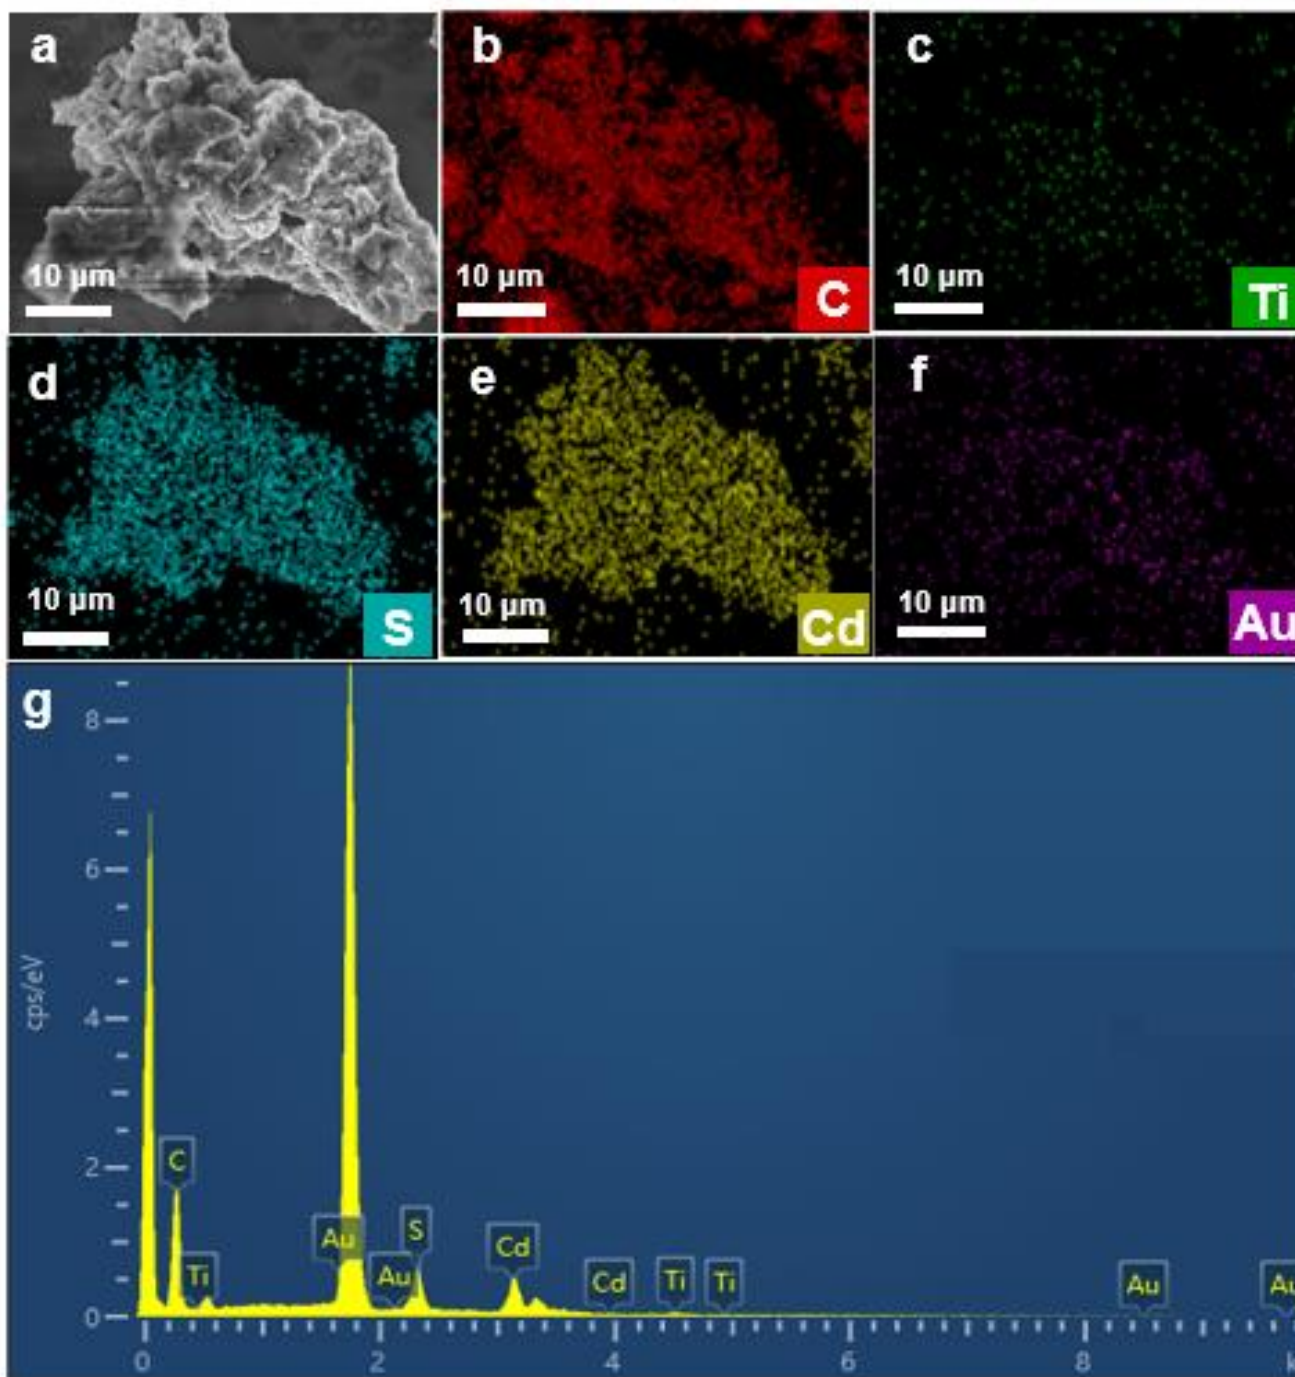

**Fig. S12.** (a) FESEM image of CTA after cyclic reaction with corresponding (b) EDS and (c-g) elemental mapping results.

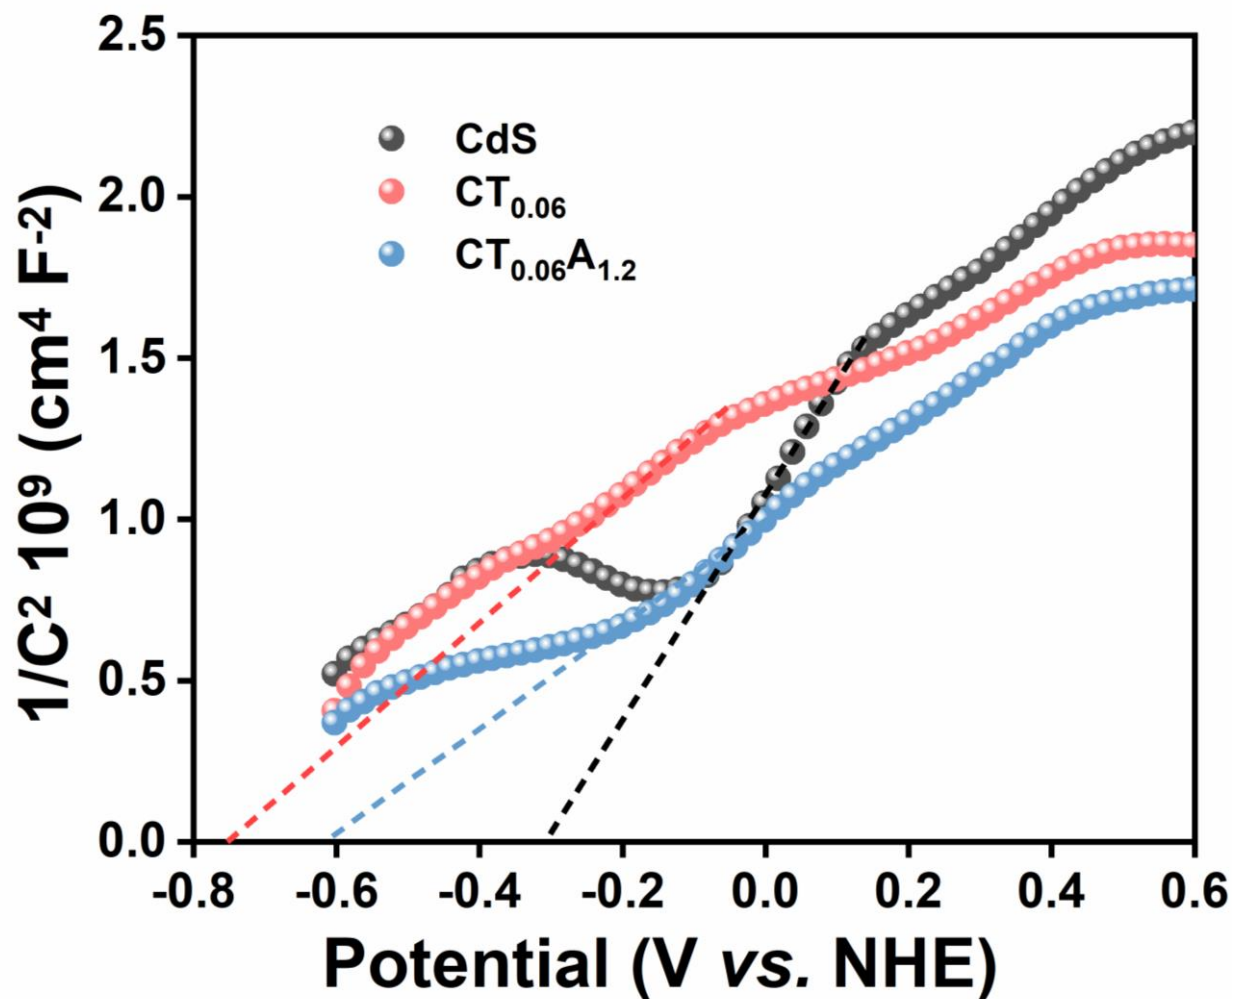

Fig. S13. (a) Mott-Schottky plots of CdS,  $CT_{0.06}$  and  $CT_{0.06}A_{1.2}$ .



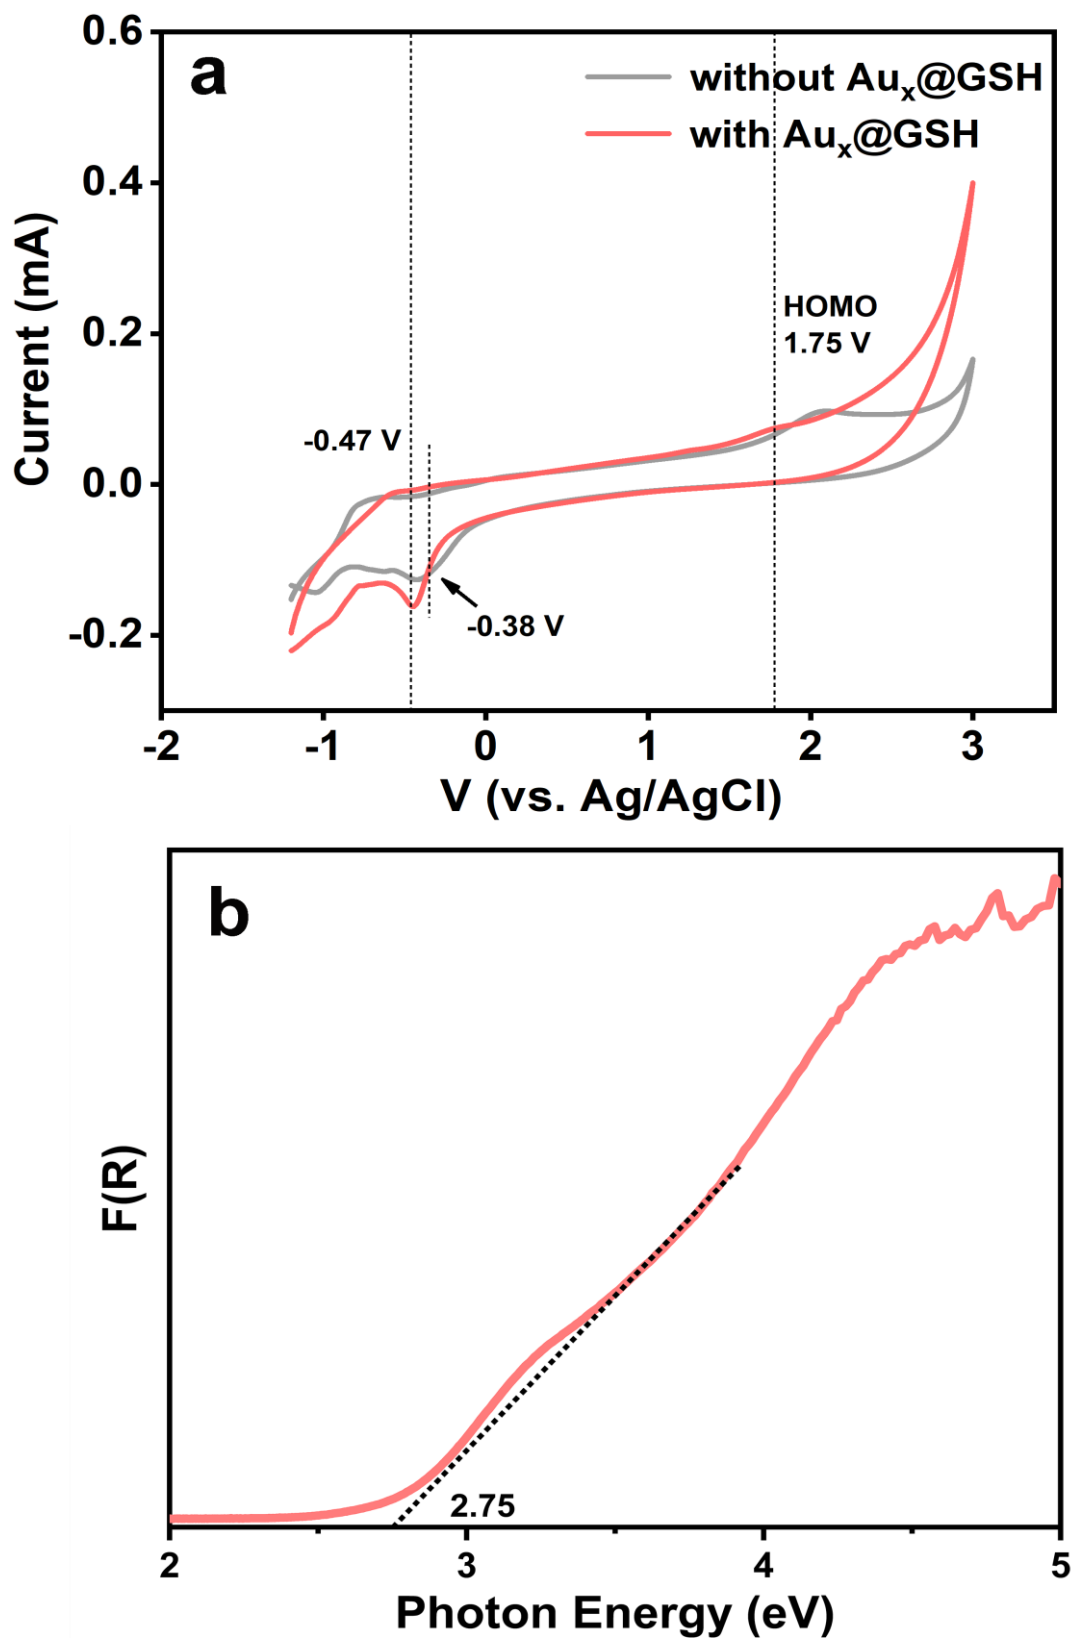

**Fig S14.** (a) CV curves of Au<sub>x</sub>@GSH NCs. (electrolyte: degassed acetonitrile containing 0.1 mol L<sup>-1</sup> TEAP); (b) Transformed plots based on the Kubelka–Munk function vs. the energy of light for Au<sub>x</sub>@GSH NCs.

**Table S1.** Peak position with corresponding functional groups.

| Peak position (cm <sup>-1</sup> ) | Vibrational mode                      | Reference |
|-----------------------------------|---------------------------------------|-----------|
| 2917/2856                         | $\nu$ -CH <sub>2</sub>                | [4]       |
| 1630                              | $\delta$ -NH <sub>2</sub> & $\nu$ -OH | [2]       |
| 3423                              | $\nu$ -COOH & $\nu$ -NH <sub>2</sub>  | [2]       |
| 613                               | Ti-O                                  | [5]       |

**Table S2.** Summary of the specific surface area, pore volume and pore size of CdS, CT and CTA.

| <b>Samples</b> | <b>SBET (m<sup>2</sup>g<sup>-1</sup>)<sup>a</sup></b> | <b>Total pore volume(cm<sup>3</sup>g<sup>-1</sup>)<sup>b</sup></b> | <b>Average pore size (nm)<sup>c</sup></b> |
|----------------|-------------------------------------------------------|--------------------------------------------------------------------|-------------------------------------------|
| <b>CdS</b>     | 36.0810                                               | 0.081219                                                           | 9.00410                                   |
| <b>CT</b>      | 67.7794                                               | 0.119111                                                           | 7.02936                                   |
| <b>CTA</b>     | 54.5328                                               | 0.109915                                                           | 8.06232                                   |

a BET surface area is calculated from the linear part of BET plot.

b Single point total pore volume of the pores at P/P<sub>0</sub>=0.95.

c Adsorption average pore width (4V/A by BET).

**Table S3.** Chemical bond species vs. B.E. for different samples.

| <b>Elements</b>            | <b>CdS</b> | <b>CT</b> | <b>CTA</b> | <b>Chemical bond species</b> | <b>Reference</b> |
|----------------------------|------------|-----------|------------|------------------------------|------------------|
| <b>Cd 3d<sub>5/2</sub></b> | 403.5      | 404.9     | 405        | Cd <sup>2+</sup>             | [6]              |
| <b>Cd 3d<sub>3/2</sub></b> | 410.3      | 411.7     | 411.8      | Cd <sup>2+</sup>             | [6]              |
| <b>S 3d<sub>3/2</sub></b>  | 160.3      | 161.3     | 161.4      | S <sup>2-</sup>              | [7]              |
| <b>S 3d<sub>1/2</sub></b>  | 161.9      | 162.4     | 162.6      | S <sup>2-</sup>              | [7]              |
| <b>C 1s A</b>              | N.D.       | 284.8     | 284.8      | C-C                          | [8]              |
| <b>C 1s B</b>              | N.D.       | 281.7     | 281.5      | C-Ti                         | [8]              |
| <b>C 1s C</b>              | N.D.       | 286.2     | 286.2      | C-O-C                        | [8]              |
| <b>C 1s D</b>              | N.D.       | 288.1     | 288.1      | C-F                          | [8]              |
| <b>Ti 2p A</b>             | N.D.       | 458.7     | N.D.       | Ti-C                         | [6]              |
| <b>Ti 2p B</b>             | N.D.       | 460.2     | N.D.       | Ti-C                         | [6]              |
| <b>Ti 2p C</b>             | N.D.       | 463.1     | N.D.       | Ti-O                         | [6]              |
| <b>Ti 2p D</b>             | N.D.       | 462.2     | N.D.       | Ti-O <sub>x</sub>            | [6]              |
| <b>Ti 2p E</b>             | N.D.       | 455.5     | N.D.       | Ti-O <sub>x</sub>            | [6]              |
| <b>Ti 2p F</b>             | N.D.       | 461.0     | N.D.       | Ti-x                         | [6]              |
| <b>Au 4f<sub>5/2</sub></b> | N.D.       | N.D.      | 88.2       | Metallic Au <sup>0</sup>     | [9]              |
| <b>Au 4f<sub>5/2</sub></b> | N.D.       | N.D.      | 89.0       | Au <sup>+</sup>              | [9]              |
| <b>Au 4f<sub>7/2</sub></b> | N.D.       | N.D.      | 84.5       | Metallic Au <sup>0</sup>     | [9]              |
| <b>Au 4f<sub>7/2</sub></b> | N.D.       | N.D.      | 85.4       | Au <sup>+</sup>              | [9]              |

**Table S4.** Fitted EIS results of sample under visible light irradiation based on the equivalent circuit.

| <b>Photoandes</b> | <b>Rs/ohm</b> | <b>CPE/(<math>\times 10^{-5}</math> F cm<sup>-2</sup>)</b> | <b>Rct/ohm</b> |
|-------------------|---------------|------------------------------------------------------------|----------------|
| <b>CdS</b>        | 14.92         | 6.791                                                      | 8869           |
| <b>CT</b>         | 15.66         | 5.874                                                      | 7190           |
| <b>CTA</b>        | 14.74         | 7.448                                                      | 5971           |

## Reference

- [1]X. Xie, N. Zhang, Z.-R. Tang, M. Anpo and Y.-J. Xu,  $Ti_3C_2T_x$  MXene as a Janus cocatalyst for concurrent promoted photoactivity and inhibited photocorrosion, *Appl. Catal. B-Environ.* 237 (2018) 43-49.
- [2]H. Liang, B.-J. Liu, B. Tang, S.-C. Zhu, S. Li, X.-Z. Ge, J.-L. Li, J.-R. Zhu and F.-X. Xiao, Atomically Precise Metal Nanocluster-Mediated Photocatalysis, *ACS Catal.* 12 (2022) 4216-4226.
- [3]X.-Y. Fu, Z.-Q. Wei, S. Xu, X. Lin, S. Hou and F.-X. Xiao, Maneuvering Intrinsic Instability of Metal Nanoclusters for Boosted Solar-Powered Hydrogen Production, *The Journal of Physical Chemistry Letters* 11 (2020) 9138–9143.
- [4]Q. Zhang, Q. An, X. Luan, H. Huang, X. Li, Z. Meng, W. Tong, X. Chen, P. K. Chu and Y. Zhang, Achieving significantly enhanced visible-light photocatalytic efficiency using a polyelectrolyte: the composites of exfoliated titania nanosheets, graphene, and poly(diallyl-dimethyl-ammonium chloride), *Nanoscale* 7 (2015) 14002-14009.
- [5]X. Li, G. Fan and C. Zeng, Synthesis of ruthenium nanoparticles deposited on graphene-like transition metal carbide as an effective catalyst for the hydrolysis of sodium borohydride, *Int. J. Hydrogen Energy.* 39 (2014) 14927-14934.
- [6]X. Chen, Y. Guo, R. Bian, Y. Ji, X. Wang, X. Zhang, H. Cui and J. Tian, Titanium carbide MXenes coupled with cadmium sulfide nanosheets as two-dimensional/two-dimensional heterostructures for photocatalytic hydrogen production, *J. Colloid Interface Sci.* 613 (2022) 644-651.
- [7]M. N. Meeran, N. Haridharan, M. Shkir, H. Algarni and V. R. M. Reddy, Rationally designed 1D CdS/TiO<sub>2</sub>@Ti<sub>3</sub>C<sub>2</sub> multi-components nanocomposites for enhanced visible light photocatalytic hydrogen production, *Chem. Phys. Lett.* 809 (2022) 140150-140159.
- [8]Y. Xia, B. Cheng, J. Fan, J. Yu and G. Liu, Unraveling Photoexcited Charge Transfer Pathway and Process of CdS/Graphene Nanoribbon Composites toward Visible-Light Photocatalytic Hydrogen Evolution, *Small* 15 (2019) 1902459-1902468.
- [9]S. Hou, M.-H. Huang and F.-X. Xiao, Stabilizing atomically precise metal nanoclusters as simultaneous charge relay mediators and photosensitizers, *J. Mater. Chem. A.* 10 (2022) 7006-7012.
